# Supplementary material for: Virtual Screening of FDA-Approved Drugs for Enhanced Binding with Mitochondrial Aldehyde Dehydrogenase
Source: MDPI journal article supplement (doi:10.3390/molecules27248773), 2022-12-10
Supplement: s1 [file s1]

Supplementary Materials for

## **Virtual Screening of FDA-Approved Drugs for Enhanced Binding with Mitochondrial Aldehyde Dehydrogenase**

**Boqian Zhou<sup>1,2</sup>, Yongguang Zhang<sup>1</sup>, Wanyun Jiang<sup>1</sup> and Haiyang Zhang<sup>1,\*</sup>**

<sup>1</sup> Department of Biological Science and Engineering, School of Chemistry and Biological Engineering, University of Science and Technology Beijing, Beijing 100083, China; 3120221410@bit.edu.cn (B.Z.); zhangyg0507@sina.com (Y.Z.); m202110881@xs.ustb.edu.cn (W.J.)

<sup>2</sup> School of Life Sciences, Beijing Institute of Technology, Beijing 100081, China

\* Correspondence: zhanghy@ustb.edu.cn

**Table S1.** Energy decomposition (kJ/mol) for identified key residues with a large contribution to the ALDH2 binding with butenafine

| Residue | $\Delta E_{\text{MM}}$ | $\Delta E_{\text{polar}}$ | $\Delta E_{\text{nonpolar}}$ | $\Delta E_{\text{bind}}$ |
|---------|------------------------|---------------------------|------------------------------|--------------------------|
| GLU-96  | $-15.4 \pm 0.0$        | $1.9 \pm 0.0$             | $0.0 \pm 0.0$                | $-13.6 \pm 0.0$          |
| ARG-99  | $18.2 \pm 0.0$         | $-3.2 \pm 0.0$            | $0.0 \pm 0.0$                | $15.0 \pm 0.0$           |
| GLU-106 | $-26.8 \pm 0.1$        | $8.7 \pm 0.1$             | $0.0 \pm 0.0$                | $-18.1 \pm 0.1$          |
| ASP-109 | $-19.1 \pm 0.0$        | $4.7 \pm 0.0$             | $0.0 \pm 0.0$                | $-14.4 \pm 0.0$          |
| LYS-112 | $32.3 \pm 0.1$         | $-11.9 \pm 0.2$           | $0.0 \pm 0.0$                | $20.4 \pm 0.2$           |
| ASP-121 | $-35.8 \pm 0.1$        | $16.1 \pm 0.5$            | $-0.0 \pm 0.0$               | $-19.8 \pm 0.4$          |
| ASP-123 | $-23.6 \pm 0.1$        | $4.1 \pm 0.1$             | $0.0 \pm 0.0$                | $-19.5 \pm 0.1$          |
| LYS-127 | $25.2 \pm 0.2$         | $-4.1 \pm 0.1$            | $-0.0 \pm 0.0$               | $21.1 \pm 0.1$           |
| ARG-130 | $17.3 \pm 0.0$         | $-2.9 \pm 0.0$            | $0.0 \pm 0.0$                | $14.4 \pm 0.0$           |
| LYS-138 | $13.9 \pm 0.0$         | $-1.2 \pm 0.0$            | $0.0 \pm 0.0$                | $12.6 \pm 0.0$           |
| LYS-178 | $40.3 \pm 0.1$         | $-19.2 \pm 0.2$           | $0.0 \pm 0.0$                | $21.1 \pm 0.2$           |
| LYS-192 | $18.6 \pm 0.0$         | $-4.4 \pm 0.0$            | $0.0 \pm 0.0$                | $14.2 \pm 0.0$           |
| GLU-195 | $-18.5 \pm 0.0$        | $4.4 \pm 0.0$             | $0.0 \pm 0.0$                | $-14.1 \pm 0.0$          |
| LYS-240 | $22.9 \pm 0.0$         | $-5.6 \pm 0.1$            | $0.0 \pm 0.0$                | $17.3 \pm 0.1$           |
| GLU-248 | $-17.3 \pm 0.1$        | $2.2 \pm 0.0$             | $0.0 \pm 0.0$                | $-15.1 \pm 0.0$          |
| ARG-251 | $16.6 \pm 0.0$         | $-1.8 \pm 0.0$            | $0.0 \pm 0.0$                | $14.7 \pm 0.0$           |
| ARG-264 | $14.3 \pm 0.0$         | $-1.4 \pm 0.0$            | $0.0 \pm 0.0$                | $12.9 \pm 0.0$           |
| GLU-268 | $-51.4 \pm 0.2$        | $30.8 \pm 0.5$            | $-0.6 \pm 0.0$               | $-21.2 \pm 0.4$          |
| LYS-272 | $20.6 \pm 0.0$         | $-3.4 \pm 0.1$            | $0.0 \pm 0.0$                | $17.2 \pm 0.0$           |
| GLU-288 | $-16.9 \pm 0.0$        | $1.8 \pm 0.0$             | $0.0 \pm 0.0$                | $-15.1 \pm 0.0$          |
| ARG-307 | $17.9 \pm 0.1$         | $-3.4 \pm 0.0$            | $0.0 \pm 0.0$                | $14.6 \pm 0.0$           |
| ARG-325 | $15.4 \pm 0.0$         | $-1.5 \pm 0.0$            | $0.0 \pm 0.0$                | $14.0 \pm 0.0$           |
| ARG-329 | $20.0 \pm 0.0$         | $-3.7 \pm 0.0$            | $0.0 \pm 0.0$                | $16.3 \pm 0.0$           |
| GLU-340 | $-17.0 \pm 0.0$        | $1.9 \pm 0.0$             | $0.0 \pm 0.0$                | $-15.0 \pm 0.0$          |
| ASP-346 | $-17.3 \pm 0.1$        | $3.2 \pm 0.0$             | $0.0 \pm 0.0$                | $-14.0 \pm 0.0$          |
| LYS-352 | $18.3 \pm 0.1$         | $-3.1 \pm 0.1$            | $0.0 \pm 0.0$                | $15.3 \pm 0.0$           |
| LYS-397 | $13.6 \pm 0.1$         | $-0.8 \pm 0.0$            | $0.0 \pm 0.0$                | $12.8 \pm 0.0$           |
| GLU-398 | $-17.0 \pm 0.1$        | $1.6 \pm 0.0$             | $0.0 \pm 0.0$                | $-15.4 \pm 0.1$          |
| GLU-399 | $-31.4 \pm 0.1$        | $11.1 \pm 0.1$            | $0.0 \pm 0.0$                | $-20.3 \pm 0.1$          |
| ASP-457 | $-42.4 \pm 0.2$        | $17.4 \pm 0.6$            | $-0.4 \pm 0.0$               | $-25.4 \pm 0.5$          |
| LYS-469 | $16.6 \pm 0.1$         | $-1.9 \pm 0.1$            | $0.0 \pm 0.0$                | $14.7 \pm 0.0$           |
| ARG-475 | $30.7 \pm 0.1$         | $-10.2 \pm 0.1$           | $-0.0 \pm 0.0$               | $20.5 \pm 0.1$           |
| GLU-476 | $-42.2 \pm 0.2$        | $17.4 \pm 0.2$            | $-0.1 \pm 0.0$               | $-24.9 \pm 0.1$          |
| GLU-479 | $-17.0 \pm 0.0$        | $2.2 \pm 0.0$             | $0.0 \pm 0.0$                | $-14.8 \pm 0.0$          |
| GLU-487 | $-14.1 \pm 0.0$        | $1.4 \pm 0.0$             | $0.0 \pm 0.0$                | $-12.7 \pm 0.0$          |
| NDP-501 | $-18.7 \pm 0.1$        | $7.5 \pm 0.1$             | $-0.2 \pm 0.0$               | $-11.4 \pm 0.2$          |

**Table S2.** Energy decomposition (kJ/mol) for identified key residues with a large contribution to the ALDH2 binding with olaparib

| Residue | $\Delta E_{\text{MM}}$ | $\Delta E_{\text{polar}}$ | $\Delta E_{\text{nonpolar}}$ | $\Delta E_{\text{bind}}$ |
|---------|------------------------|---------------------------|------------------------------|--------------------------|
| ALA-7   | $-0.0 \pm 0.0$         | $0.3 \pm 0.0$             | $0.0 \pm 0.0$                | $0.3 \pm 0.0$            |
| ARG-99  | $-0.0 \pm 0.0$         | $1.8 \pm 0.1$             | $0.0 \pm 0.0$                | $1.8 \pm 0.0$            |
| LYS-112 | $-0.6 \pm 0.1$         | $1.2 \pm 0.2$             | $0.0 \pm 0.0$                | $0.6 \pm 0.2$            |
| VAL-120 | $-7.3 \pm 0.2$         | $0.9 \pm 0.1$             | $-1.0 \pm 0.0$               | $-7.4 \pm 0.2$           |
| ASP-121 | $0.0 \pm 0.1$          | $3.1 \pm 0.6$             | $-0.0 \pm 0.0$               | $3.1 \pm 0.5$            |
| ASP-123 | $-2.1 \pm 0.1$         | $-2.0 \pm 0.3$            | $-0.0 \pm 0.0$               | $-4.1 \pm 0.2$           |
| MET-124 | $-6.0 \pm 0.2$         | $1.1 \pm 0.1$             | $-0.8 \pm 0.0$               | $-5.7 \pm 0.1$           |
| LYS-127 | $1.1 \pm 0.1$          | $4.0 \pm 0.2$             | $-0.0 \pm 0.0$               | $5.1 \pm 0.2$            |
| PHE-170 | $-5.7 \pm 0.1$         | $1.5 \pm 0.0$             | $-0.4 \pm 0.0$               | $-4.6 \pm 0.1$           |
| TRP-177 | $-17.2 \pm 0.2$        | $8.4 \pm 0.1$             | $-1.4 \pm 0.0$               | $-10.2 \pm 0.2$          |
| LYS-178 | $-7.7 \pm 0.1$         | $8.0 \pm 0.4$             | $-0.1 \pm 0.0$               | $0.1 \pm 0.4$            |
| GLU-268 | $4.1 \pm 0.1$          | $1.7 \pm 0.4$             | $-0.1 \pm 0.0$               | $5.6 \pm 0.4$            |
| ASP-282 | $-0.3 \pm 0.0$         | $-0.2 \pm 0.0$            | $0.0 \pm 0.0$                | $-0.6 \pm 0.0$           |
| ASP-284 | $-0.1 \pm 0.0$         | $-0.3 \pm 0.0$            | $0.0 \pm 0.0$                | $-0.4 \pm 0.0$           |
| GLU-288 | $0.2 \pm 0.0$          | $-1.1 \pm 0.0$            | $0.0 \pm 0.0$                | $-0.8 \pm 0.1$           |
| PHE-292 | $-0.3 \pm 0.0$         | $-0.4 \pm 0.0$            | $-0.0 \pm 0.0$               | $-0.7 \pm 0.0$           |
| PHE-296 | $-5.1 \pm 0.2$         | $1.9 \pm 0.1$             | $-0.5 \pm 0.0$               | $-3.7 \pm 0.2$           |
| CYS-301 | $-0.2 \pm 0.0$         | $1.7 \pm 0.1$             | $-0.0 \pm 0.0$               | $1.5 \pm 0.1$            |
| CYS-302 | $-4.4 \pm 0.1$         | $4.4 \pm 0.1$             | $-0.4 \pm 0.0$               | $-0.4 \pm 0.1$           |
| CYS-303 | $-2.4 \pm 0.1$         | $1.2 \pm 0.1$             | $-0.1 \pm 0.0$               | $-1.3 \pm 0.1$           |
| ARG-325 | $-0.1 \pm 0.0$         | $0.7 \pm 0.0$             | $0.0 \pm 0.0$                | $0.6 \pm 0.0$            |
| ARG-329 | $-1.2 \pm 0.0$         | $2.4 \pm 0.1$             | $0.0 \pm 0.0$                | $1.3 \pm 0.1$            |
| GLU-340 | $0.8 \pm 0.0$          | $-1.3 \pm 0.0$            | $0.0 \pm 0.0$                | $-0.5 \pm 0.0$           |
| ASP-457 | $-9.8 \pm 0.3$         | $6.9 \pm 0.6$             | $-0.7 \pm 0.0$               | $-3.6 \pm 0.5$           |
| PHE-459 | $-15.2 \pm 0.2$        | $4.2 \pm 0.1$             | $-1.3 \pm 0.0$               | $-12.3 \pm 0.2$          |
| PHE-465 | $-13.3 \pm 0.2$        | $3.2 \pm 0.0$             | $-0.7 \pm 0.0$               | $-10.9 \pm 0.2$          |
| NDP-501 | $0.0 \pm 0.0$          | $0.6 \pm 0.1$             | $-0.0 \pm 0.0$               | $0.5 \pm 0.1$            |

**Table S3.** Energy decomposition (kJ/mol) for identified key residues with a large contribution to the ALDH2 binding with fexofenadine

| Residue | $\Delta E_{\text{MM}}$ | $\Delta E_{\text{polar}}$ | $\Delta E_{\text{nonpolar}}$ | $\Delta E_{\text{bind}}$ |
|---------|------------------------|---------------------------|------------------------------|--------------------------|
| ALA-7   | $4.8 \pm 0.1$          | $0.1 \pm 0.0$             | $0.0 \pm 0.0$                | $4.9 \pm 0.1$            |
| ARG-99  | $5.2 \pm 0.1$          | $0.4 \pm 0.0$             | $0.0 \pm 0.0$                | $5.5 \pm 0.0$            |
| LYS-112 | $-3.3 \pm 0.2$         | $5.0 \pm 0.2$             | $0.0 \pm 0.0$                | $1.7 \pm 0.2$            |
| VAL-120 | $-5.1 \pm 0.1$         | $-0.5 \pm 0.1$            | $-1.0 \pm 0.0$               | $-6.6 \pm 0.1$           |
| ASP-121 | $-5.4 \pm 0.3$         | $2.3 \pm 0.6$             | $-0.0 \pm 0.0$               | $-3.1 \pm 0.5$           |
| ASP-123 | $-9.1 \pm 0.1$         | $-0.8 \pm 0.1$            | $0.0 \pm 0.0$                | $-9.8 \pm 0.1$           |
| MET-124 | $-3.0 \pm 0.2$         | $0.8 \pm 0.1$             | $-0.5 \pm 0.0$               | $-2.7 \pm 0.1$           |
| LYS-127 | $10.1 \pm 0.2$         | $0.8 \pm 0.1$             | $0.0 \pm 0.0$                | $10.9 \pm 0.1$           |
| PHE-170 | $-9.5 \pm 0.1$         | $2.8 \pm 0.1$             | $-0.6 \pm 0.0$               | $-7.2 \pm 0.1$           |
| TRP-177 | $-2.9 \pm 0.1$         | $1.1 \pm 0.0$             | $-0.2 \pm 0.0$               | $-2.0 \pm 0.1$           |
| LYS-178 | $-10.6 \pm 0.1$        | $2.9 \pm 0.1$             | $0.0 \pm 0.0$                | $-7.7 \pm 0.1$           |
| GLU-268 | $12.4 \pm 0.1$         | $-2.3 \pm 0.2$            | $-0.1 \pm 0.0$               | $10.0 \pm 0.2$           |
| ASP-282 | $-5.0 \pm 0.0$         | $0.4 \pm 0.0$             | $0.0 \pm 0.0$                | $-4.6 \pm 0.0$           |
| ASP-284 | $-5.5 \pm 0.1$         | $0.7 \pm 0.0$             | $0.0 \pm 0.0$                | $-4.9 \pm 0.1$           |
| GLU-288 | $-15.0 \pm 0.2$        | $8.4 \pm 0.3$             | $-0.2 \pm 0.0$               | $-6.7 \pm 0.2$           |
| PHE-292 | $-7.3 \pm 0.2$         | $2.7 \pm 0.1$             | $-1.1 \pm 0.0$               | $-5.6 \pm 0.2$           |
| PHE-296 | $-10.8 \pm 0.2$        | $3.8 \pm 0.1$             | $-1.1 \pm 0.0$               | $-8.1 \pm 0.2$           |
| CYS-301 | $-20.9 \pm 0.2$        | $11.7 \pm 0.1$            | $-0.5 \pm 0.0$               | $-9.7 \pm 0.1$           |
| CYS-302 | $-19.0 \pm 0.2$        | $13.9 \pm 0.1$            | $-0.4 \pm 0.0$               | $-5.5 \pm 0.2$           |
| CYS-303 | $-13.0 \pm 0.4$        | $7.9 \pm 0.2$             | $-0.2 \pm 0.0$               | $-5.3 \pm 0.3$           |
| ARG-325 | $7.0 \pm 0.1$          | $-1.3 \pm 0.0$            | $0.0 \pm 0.0$                | $5.7 \pm 0.0$            |
| ARG-329 | $8.0 \pm 0.1$          | $2.2 \pm 0.3$             | $-0.0 \pm 0.0$               | $10.2 \pm 0.3$           |
| GLU-340 | $-8.8 \pm 0.1$         | $0.4 \pm 0.1$             | $-0.0 \pm 0.0$               | $-8.4 \pm 0.1$           |
| ASP-457 | $-31.4 \pm 0.3$        | $35.0 \pm 0.6$            | $-0.9 \pm 0.0$               | $2.8 \pm 0.5$            |
| PHE-459 | $-9.2 \pm 0.2$         | $2.6 \pm 0.1$             | $-0.7 \pm 0.0$               | $-7.3 \pm 0.2$           |
| PHE-465 | $-3.9 \pm 0.1$         | $2.5 \pm 0.0$             | $-0.3 \pm 0.0$               | $-1.7 \pm 0.1$           |
| NDP-501 | $1.3 \pm 0.2$          | $0.8 \pm 0.2$             | $-0.0 \pm 0.0$               | $2.1 \pm 0.1$            |

**Table S4.** Energy decomposition (kJ/mol) for identified key residues with a large contribution to the ALDH2 binding with daidzin

| Residue | $\Delta E_{\text{MM}}$ | $\Delta E_{\text{polar}}$ | $\Delta E_{\text{nonpolar}}$ | $\Delta E_{\text{bind}}$ |
|---------|------------------------|---------------------------|------------------------------|--------------------------|
| ALA-7   | $-0.5 \pm 0.0$         | $0.2 \pm 0.0$             | $0.0 \pm 0.0$                | $-0.3 \pm 0.0$           |
| ARG-99  | $-1.5 \pm 0.1$         | $2.5 \pm 0.1$             | $0.0 \pm 0.0$                | $0.9 \pm 0.1$            |
| LYS-112 | $-1.0 \pm 0.1$         | $5.1 \pm 0.1$             | $0.0 \pm 0.0$                | $4.1 \pm 0.1$            |
| VAL-120 | $-5.5 \pm 0.2$         | $0.7 \pm 0.0$             | $-0.6 \pm 0.0$               | $-5.4 \pm 0.1$           |
| ASP-121 | $0.6 \pm 0.1$          | $-5.6 \pm 0.2$            | $0.0 \pm 0.0$                | $-5.0 \pm 0.1$           |
| ASP-123 | $3.8 \pm 0.3$          | $-4.9 \pm 0.3$            | $-0.1 \pm 0.0$               | $-1.1 \pm 0.2$           |
| MET-124 | $-6.5 \pm 0.1$         | $2.5 \pm 0.0$             | $-0.5 \pm 0.0$               | $-4.5 \pm 0.1$           |
| LYS-127 | $-4.3 \pm 0.3$         | $7.0 \pm 0.4$             | $-0.0 \pm 0.0$               | $2.6 \pm 0.2$            |
| PHE-170 | $-7.0 \pm 0.1$         | $3.1 \pm 0.1$             | $-0.5 \pm 0.0$               | $-4.5 \pm 0.1$           |
| TRP-177 | $-4.6 \pm 0.1$         | $2.0 \pm 0.1$             | $-0.2 \pm 0.0$               | $-2.7 \pm 0.1$           |
| LYS-178 | $-0.3 \pm 0.1$         | $-0.7 \pm 0.1$            | $0.0 \pm 0.0$                | $-1.0 \pm 0.1$           |
| GLU-268 | $-1.6 \pm 0.1$         | $0.7 \pm 0.2$             | $-0.1 \pm 0.0$               | $-1.0 \pm 0.2$           |
| ASP-282 | $-0.6 \pm 0.0$         | $0.1 \pm 0.0$             | $0.0 \pm 0.0$                | $-0.5 \pm 0.0$           |
| ASP-284 | $-0.6 \pm 0.0$         | $0.1 \pm 0.0$             | $0.0 \pm 0.0$                | $-0.5 \pm 0.0$           |
| GLU-288 | $-1.1 \pm 0.1$         | $0.2 \pm 0.1$             | $0.0 \pm 0.0$                | $-0.9 \pm 0.1$           |
| PHE-292 | $-2.9 \pm 0.1$         | $3.9 \pm 0.2$             | $-0.4 \pm 0.0$               | $0.6 \pm 0.1$            |
| PHE-296 | $-9.8 \pm 0.1$         | $3.2 \pm 0.1$             | $-0.8 \pm 0.0$               | $-7.4 \pm 0.1$           |
| CYS-301 | $-7.2 \pm 0.1$         | $7.0 \pm 0.1$             | $-0.2 \pm 0.0$               | $-0.4 \pm 0.1$           |
| CYS-302 | $-6.5 \pm 0.2$         | $7.5 \pm 0.1$             | $-0.2 \pm 0.0$               | $0.7 \pm 0.1$            |
| CYS-303 | $-8.3 \pm 0.2$         | $4.1 \pm 0.1$             | $-0.4 \pm 0.0$               | $-4.6 \pm 0.2$           |
| ARG-325 | $0.7 \pm 0.1$          | $-0.1 \pm 0.0$            | $0.0 \pm 0.0$                | $0.6 \pm 0.0$            |
| ARG-329 | $0.8 \pm 0.2$          | $1.3 \pm 0.1$             | $0.0 \pm 0.0$                | $2.1 \pm 0.1$            |
| GLU-340 | $-0.3 \pm 0.1$         | $-1.0 \pm 0.1$            | $0.0 \pm 0.0$                | $-1.3 \pm 0.1$           |
| ASP-457 | $-23.8 \pm 0.3$        | $37.1 \pm 0.5$            | $-1.1 \pm 0.0$               | $12.2 \pm 0.4$           |
| PHE-459 | $-12.0 \pm 0.2$        | $3.4 \pm 0.1$             | $-0.8 \pm 0.0$               | $-9.3 \pm 0.2$           |
| PHE-465 | $-5.9 \pm 0.1$         | $2.1 \pm 0.0$             | $-0.3 \pm 0.0$               | $-4.1 \pm 0.1$           |
| NDP-501 | $-3.5 \pm 0.1$         | $4.4 \pm 0.1$             | $-0.3 \pm 0.0$               | $0.7 \pm 0.2$            |
